# Supplementary material for: Overcoming Tumor Resistance to Oncolyticvaccinia Virus with Anti-PD-1-Based Combination Therapy by Inducing Antitumor Immunity in the Tumor Microenvironment
Source: PubMed Central journal article supplement (PMC7350271; doi:10.3390/vaccines8020321), 2020-06-19
Supplement: vaccines-08-00321-s001.pdf [file vaccines-08-00321-s001.pdf]

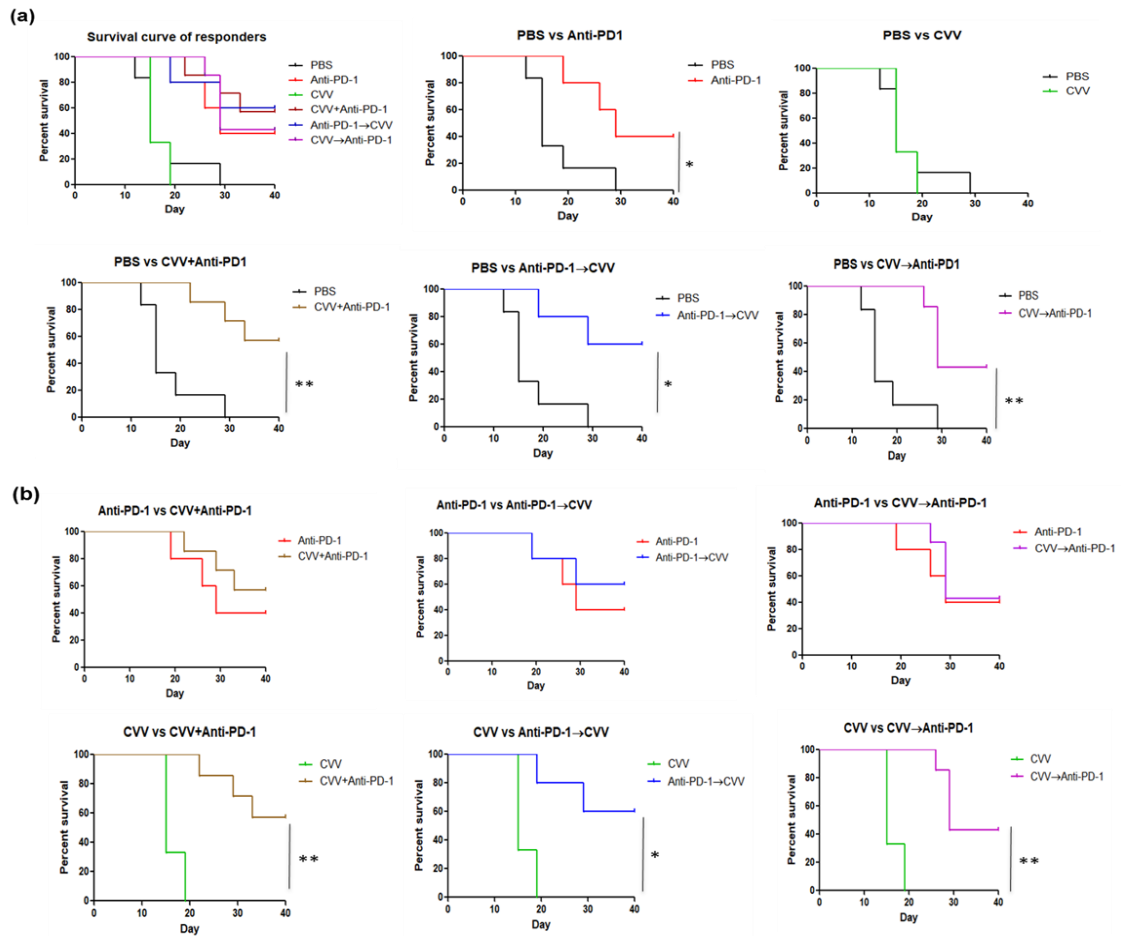

**Figure S1.** Survival curve analyses. Kaplan–Meier curves were plotted on the basis of tumor volume. Tumor volume  $>1000 \text{ mm}^3$  was considered death. **(a)** Survival curve among responders. **(b)** Survival curve among responders: monotherapy vs. combination therapy. \*  $p < 0.05$ ; \*\*  $p < 0.01$ .
